# Supplementary material
Source: PubMed Central journal article supplement (PMC4250405)
Supplement: NIHMS635668-supplement-7.pdf [file NIHMS635668-supplement-7.pdf]

Supplementary Figure 6

Supernatant Pellet

A

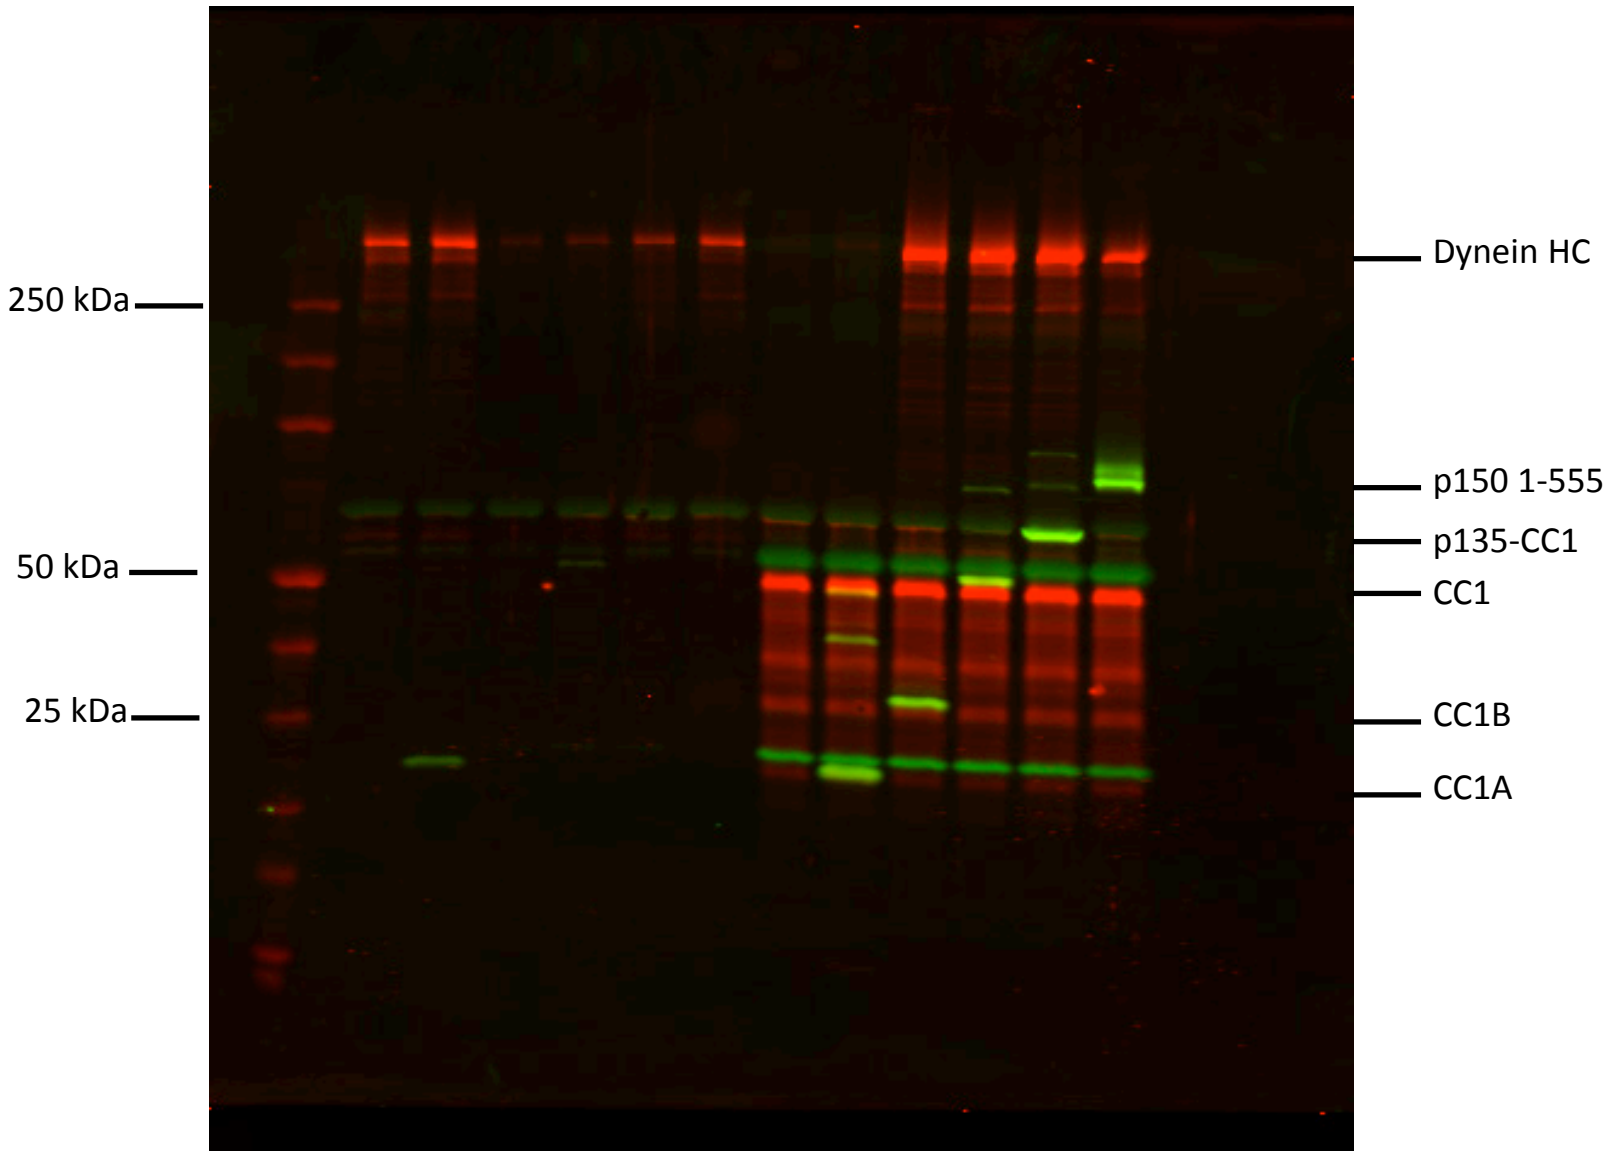

Full scan for Fig 1D

B

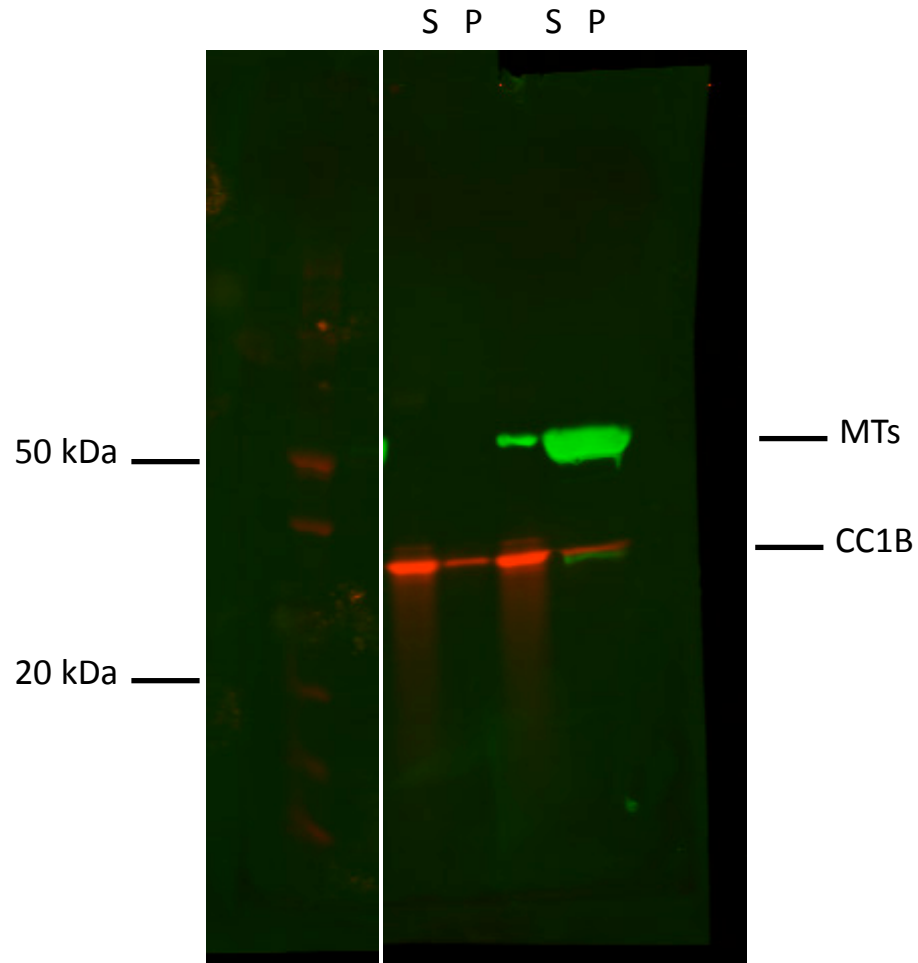

Full scan for Fig 1E panel 1

C

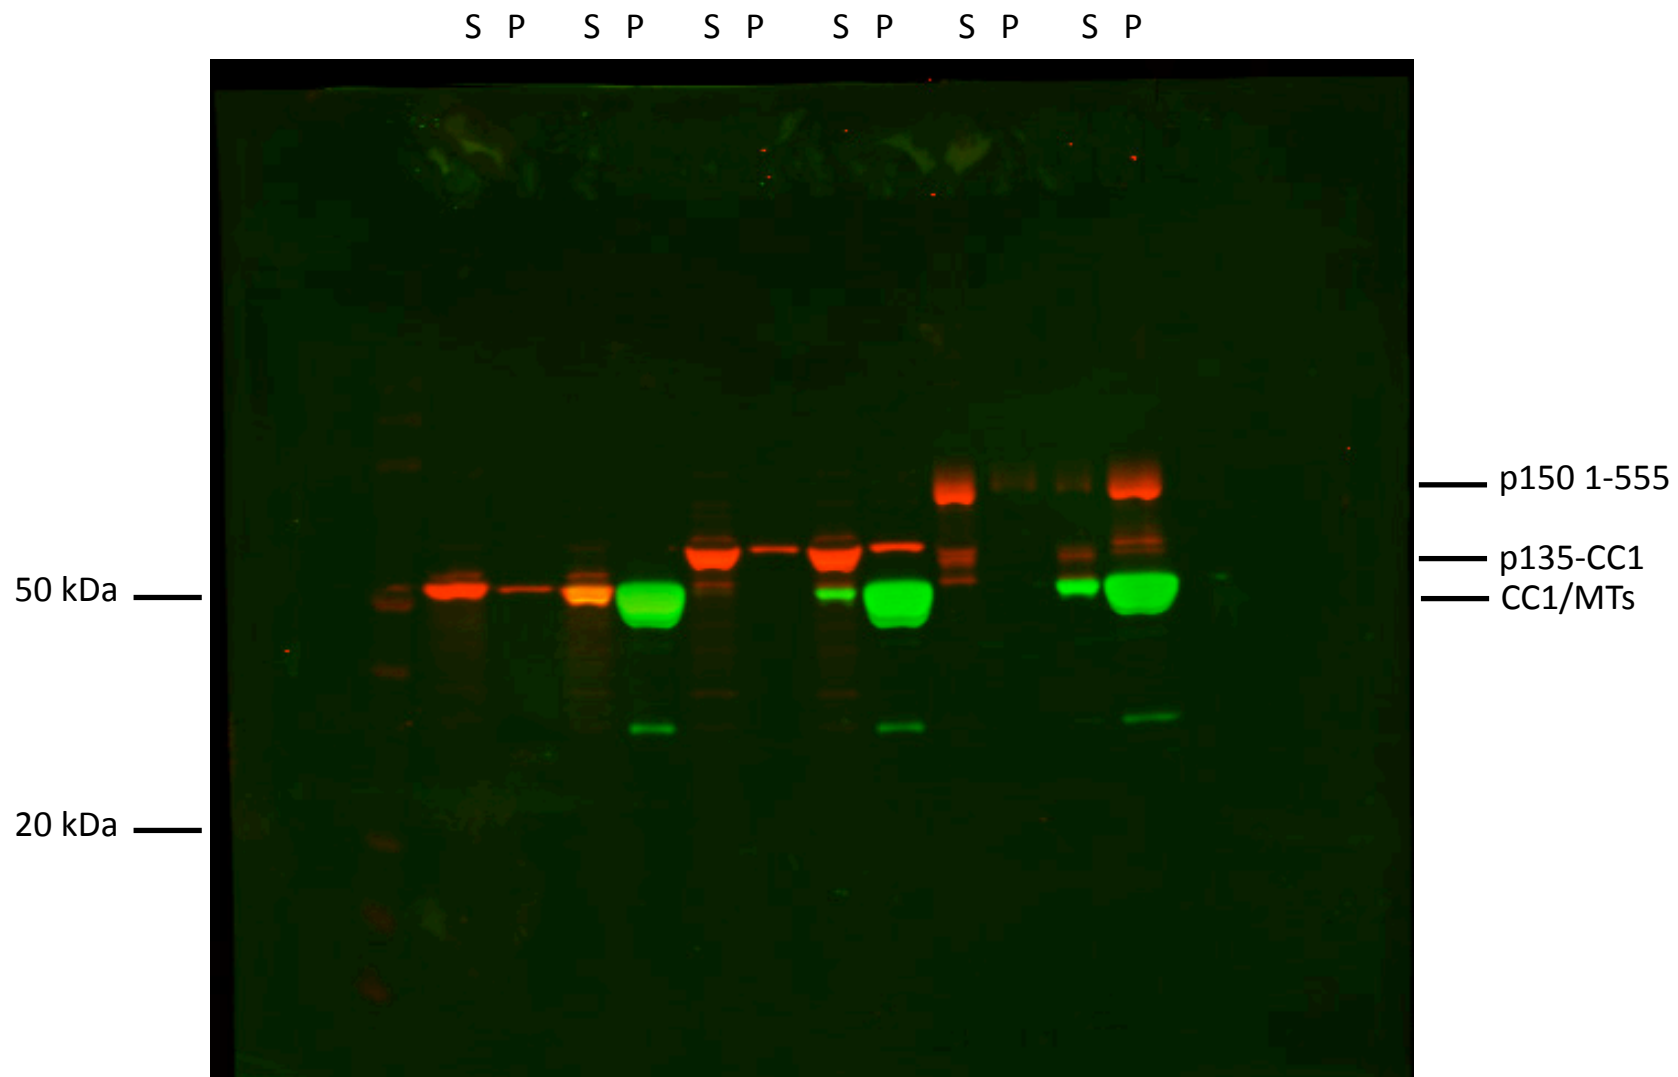

Full scan for Fig 1E panels 2-4

D

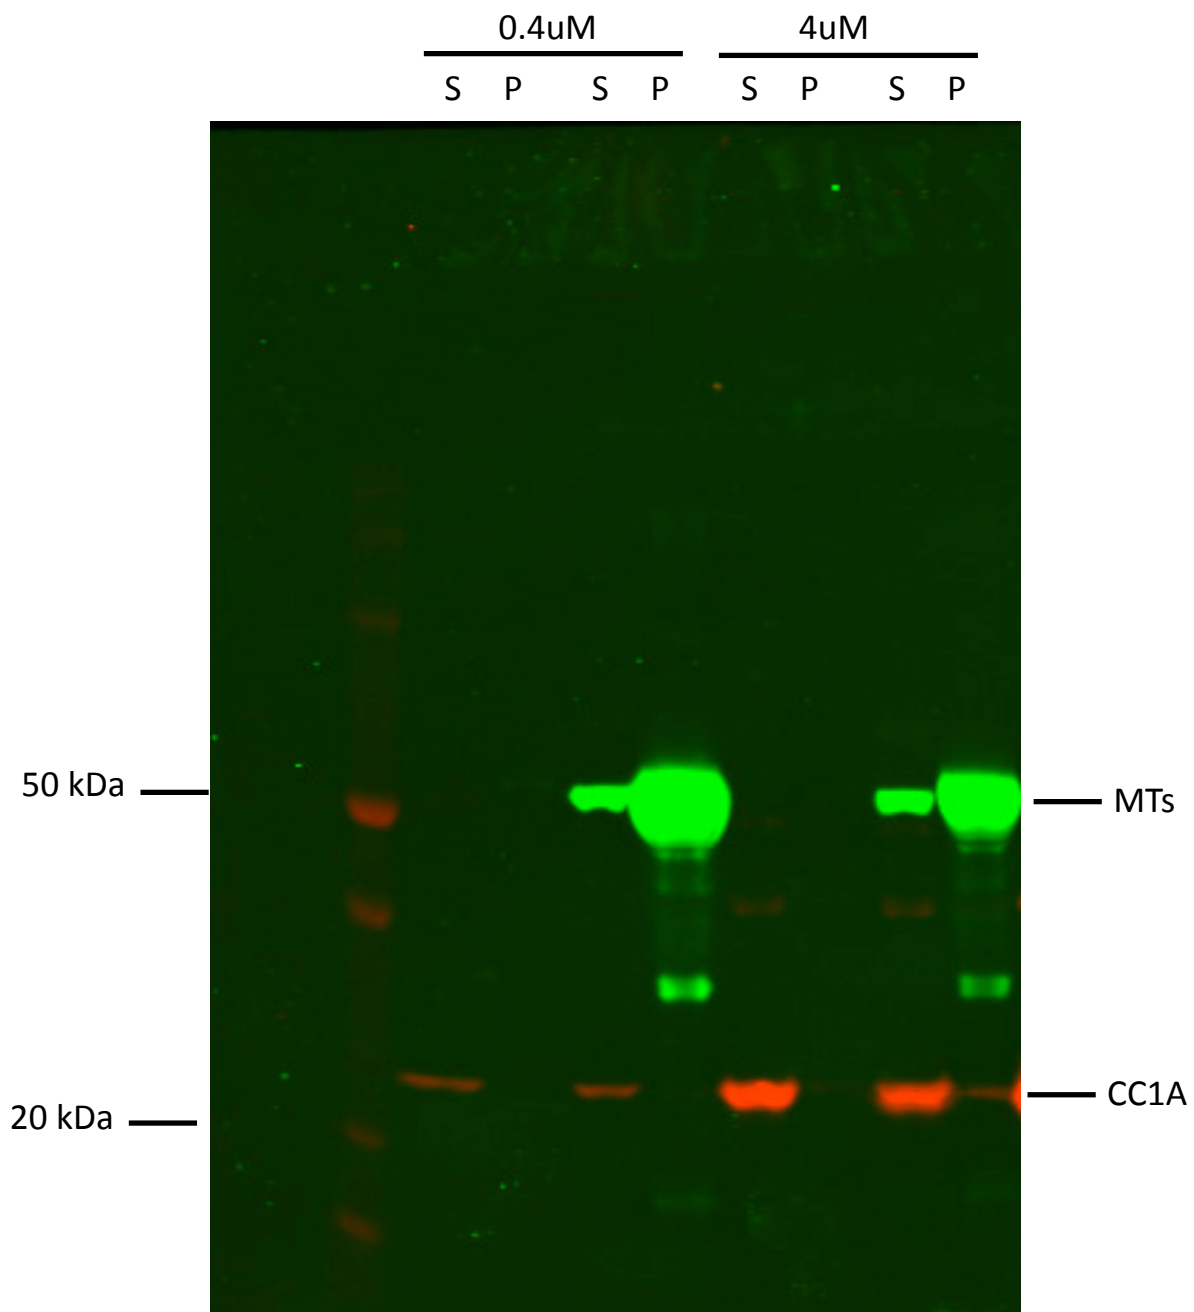

Full scan for Fig 1E panel 5

E

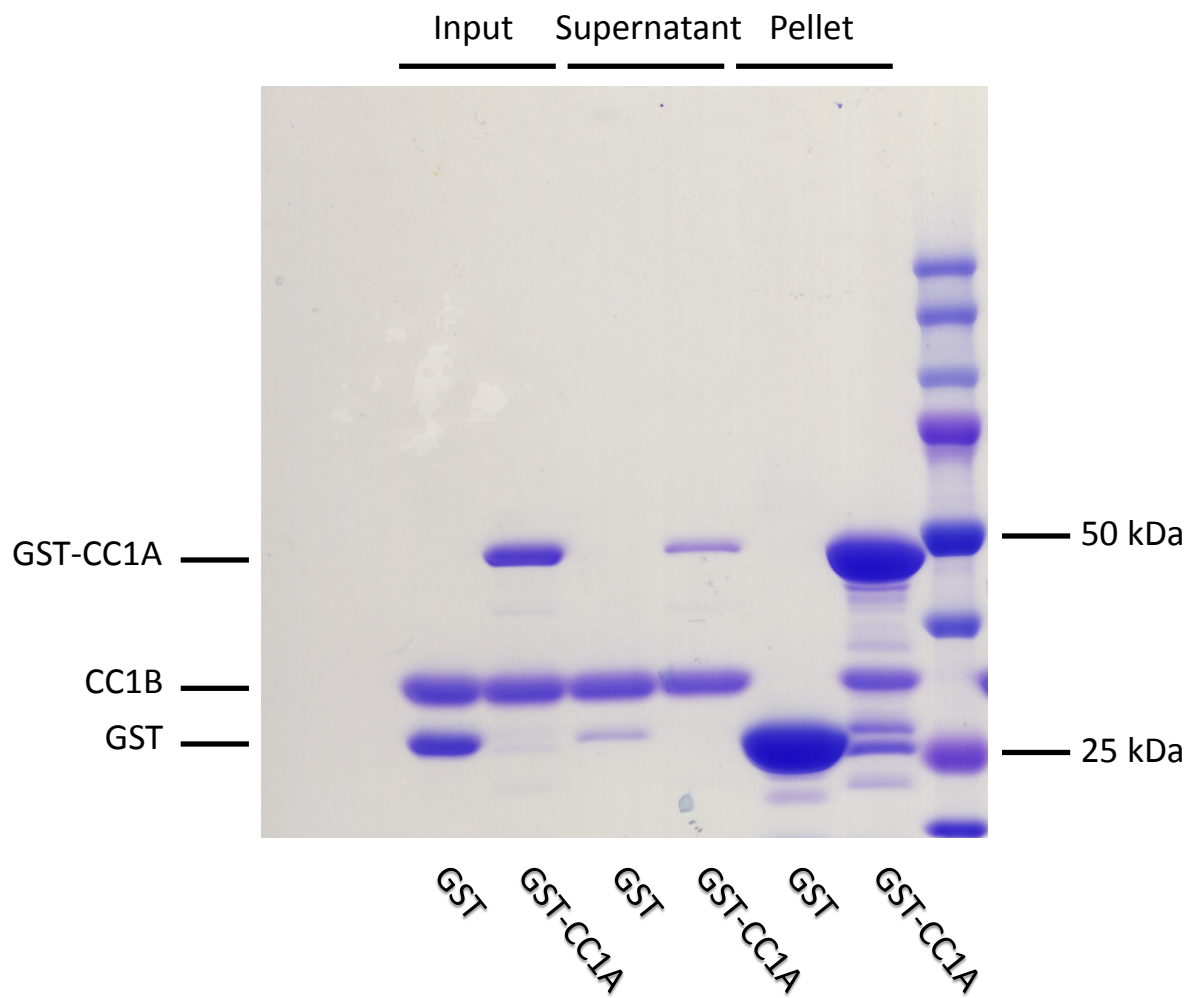

Full scan for Fig 6A

F

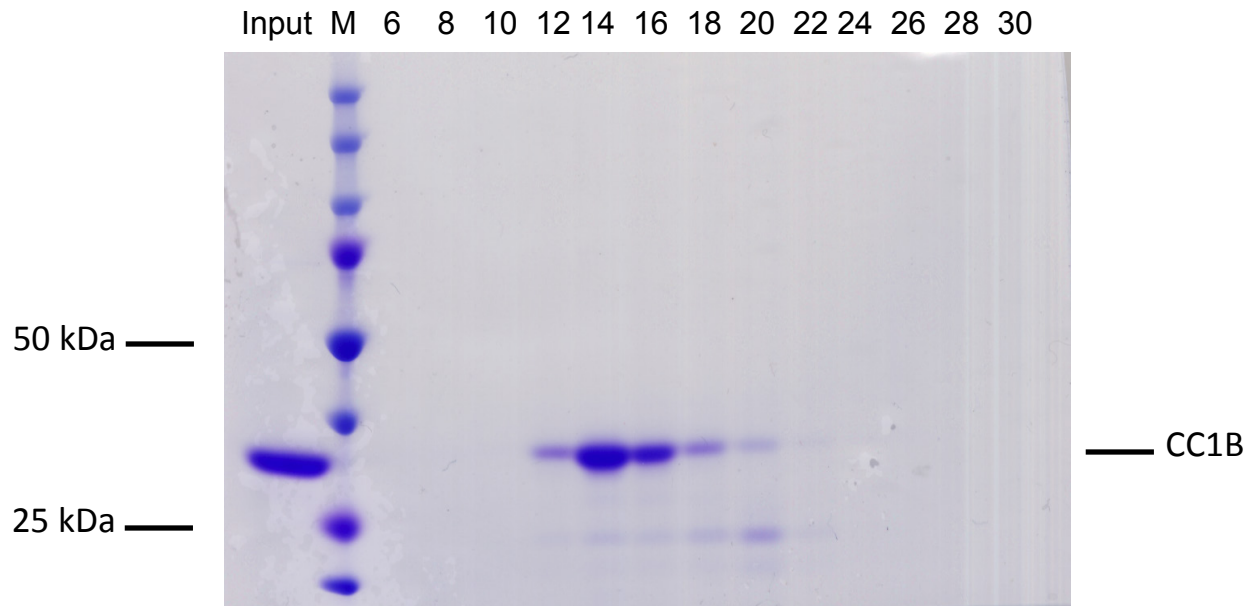

Full scan for Fig 6B upper panel

G

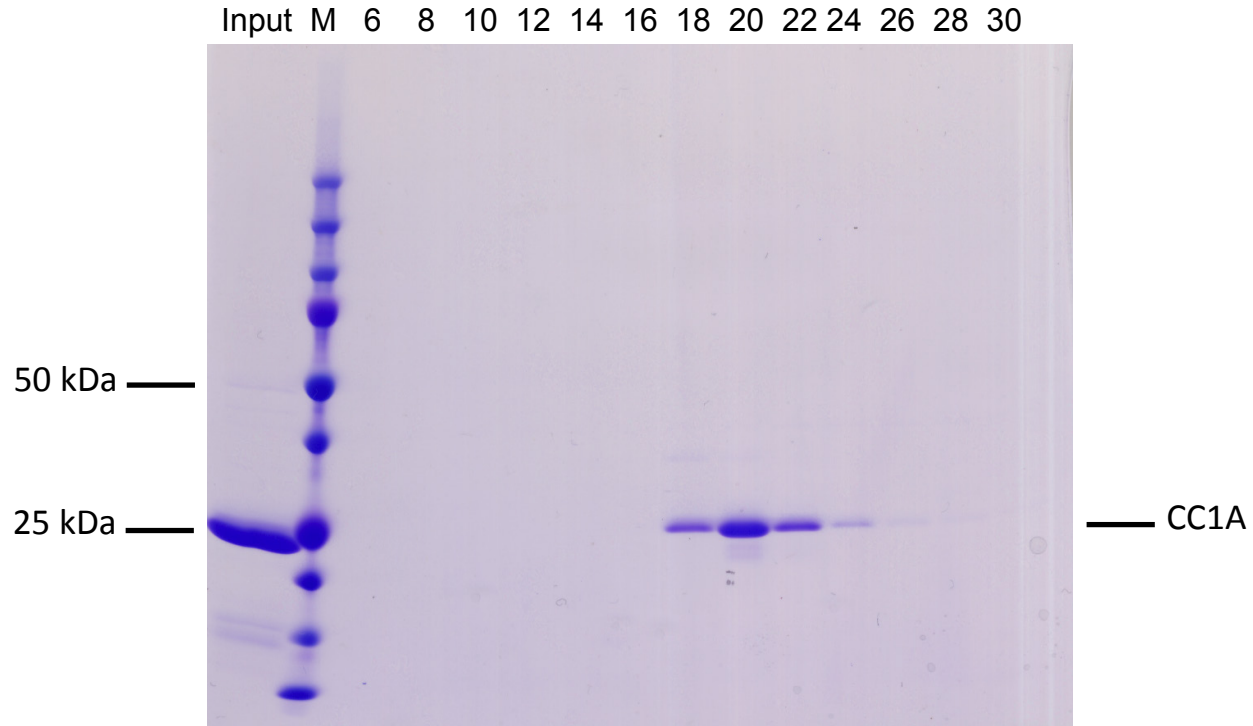

Full scan for Fig 6B middle panel

H

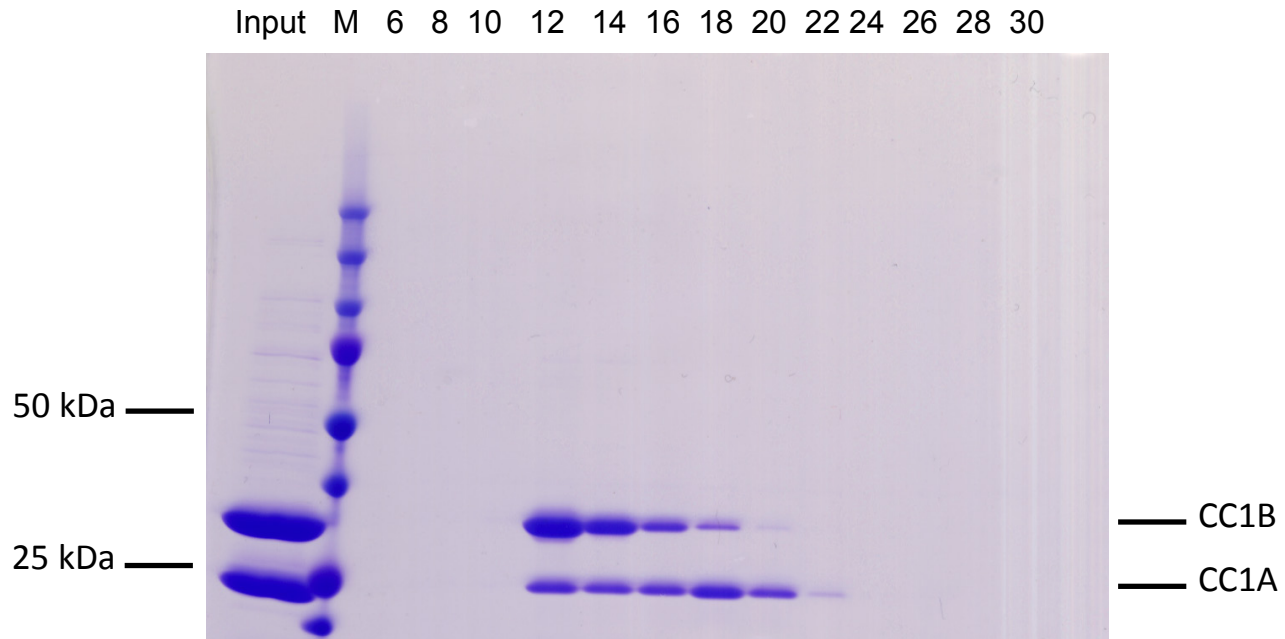

Full scan for Fig 6B lower panel
